# Supplementary material for: Aldehyde dehydrogenase activity is necessary for beta cell development and functionality in mice
Source: PubMed Central journal article supplement (PMC4670456; doi:10.1007/s00125-015-3784-4), 2015-10-31
Supplement: 125_2015_3784_MOESM6_ESM.pdf [file 125_2015_3784_MOESM6_ESM.pdf]

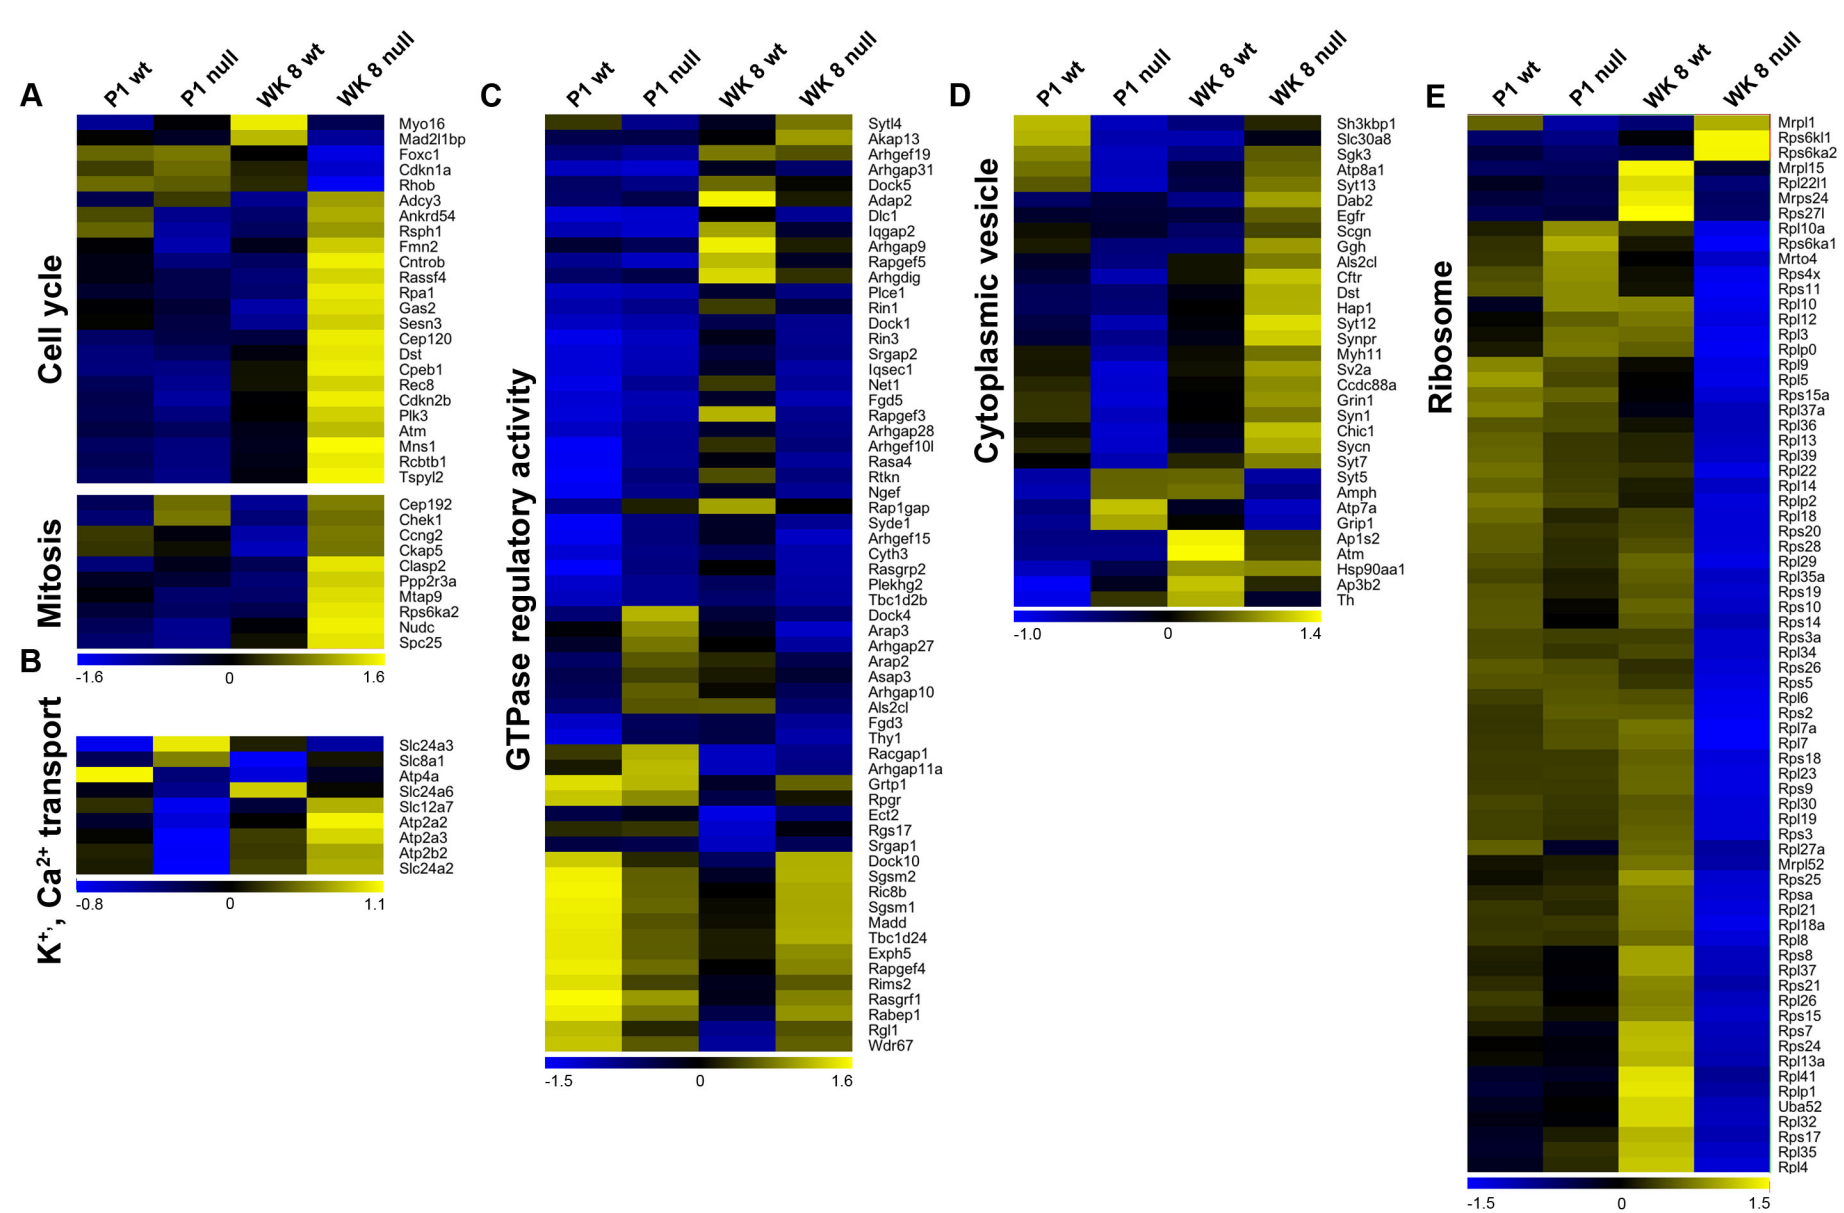

**ESM Fig. 5. Heat maps of regulated genes involved in key processes of  $\beta$ -cell function and ontogeny**

(A-E) Z-score heatmaps showed misregulated expression of several genes involved in cell cycle control and mitosis (A),  $K^+$  and  $Ca^{2+}$  transport (B), GTPase regulatory activity (C) cytoplasmic vesicle formation (D) and ribosome biogenesis (E).
