# Supplementary material for: Aldehyde dehydrogenase activity is necessary for beta cell development and functionality in mice
Source: PubMed Central journal article supplement (PMC4670456; doi:10.1007/s00125-015-3784-4), 2015-10-31
Supplement: 125_2015_3784_MOESM8_ESM.pdf [file 125_2015_3784_MOESM8_ESM.pdf]

**ESM Table 1** List of regulated genes by functional category appearing in the heat maps of the main figures

| FULL GENE NAME                                                            | GENE SYMBOL | WT P1   | NULL P1 | FOLD | Padj | WT WK8  | MUT WK8 | FOLD | Padj |
|---------------------------------------------------------------------------|-------------|---------|---------|------|------|---------|---------|------|------|
| <b>TRANSCRIPTION FACTORS</b>                                              |             |         |         |      |      |         |         |      |      |
| GATA binding protein 4                                                    | Gata4       | 103.70  | 480.05  | 4.63 | 0.03 | 843.26  | 134.42  | 0.16 | 0.00 |
| insulinoma-associated 1                                                   | Insm1       | 3011.99 | 1569.74 | 0.52 | 0.04 | 1610.22 | 3726.25 | 2.31 | 0.00 |
| ISL1 transcription factor, LIM/homeodomain                                | Isl1        | 1519.68 | 868.43  | 0.57 | 0.00 | 1125.45 | 1698.15 | 1.51 | 0.43 |
| v-maf musculoaponeurotic fibrosarcoma oncogene family, protein A          | Mafa        | 367.82  | 178.77  | 0.49 | 0.00 | 543.21  | 1579.28 | 2.91 | 0.00 |
| v-maf musculoaponeurotic fibrosarcoma oncogene family, protein B          | Mafb        | 2276.07 | 1315.86 | 0.58 | 0.01 | 766.46  | 664.41  | 0.87 | 0.48 |
| motor neuron and pancreas homeobox 1                                      | Mnx1        | 376.14  | 130.16  | 0.35 | 0.08 | 134.63  | 274.07  | 2.04 | 0.10 |
| myelin transcription factor 1                                             | Myt1        | 1268.86 | 738.70  | 0.58 | 0.14 | 749.03  | 1411.09 | 1.88 | 0.00 |
| neurogenic differentiation 1                                              | Neurod1     | 2189.51 | 1238.28 | 0.57 | 0.14 | 1165.05 | 2489.82 | 2.14 | 0.00 |
| nuclear factor of activated T-cells, cytoplasmic, calcineurin-dependent 1 | Nfatc1      | 666.85  | 940.04  | 1.41 | 0.31 | 603.36  | 358.79  | 0.59 | 0.00 |
| nuclear factor, erythroid derived 2, like 2                               | Nfe2l2      | 2015.71 | 2064.83 | 1.02 | 0.99 | 1791.06 | 1051.06 | 0.59 | 0.00 |
| NK2 transcription factor related, locus 2                                 | Nkx2-2      | 1669.40 | 873.31  | 0.52 | 0.00 | 967.18  | 1610.89 | 1.67 | 0.00 |
| NK6 homeobox 1                                                            | Nkx6-1      | 2786.42 | 1664.19 | 0.60 | 0.10 | 2771.10 | 5584.75 | 2.02 | 0.00 |
| paired box gene 6                                                         | Pax6        | 3267.28 | 2007.80 | 0.61 | 0.02 | 2208.14 | 3944.29 | 1.79 | 0.01 |
| pancreatic and duodenal homeobox 1                                        | Pdx1        | 1432.91 | 819.09  | 0.57 | 0.32 | 1106.58 | 1907.39 | 1.72 | 0.00 |
| <b>GLYCOLYSIS AND GLUTAMINOLYSIS</b>                                      |             |         |         |      |      |         |         |      |      |
| myelocytomatosis oncogene                                                 | Myc         | 1978.44 | 2518.44 | 1.27 | 0.49 | 2007.72 | 510.32  | 0.25 | 0.00 |
| hexokinase 2                                                              | Hk2         | 149.66  | 353.35  | 2.36 | 0.09 | 371.52  | 48.82   | 0.13 | 0.00 |
| hexokinase domain containing 1                                            | Hkdc1       | 47.75   | 204.50  | 4.28 | 0.00 | 137.71  | 30.71   | 0.22 | 0.00 |
| enolase 2, gamma neuronal                                                 | Eno2        | 429.52  | 494.51  | 1.15 | 0.79 | 625.34  | 1042.20 | 1.67 | 0.01 |
| hexokinase 1                                                              | Hk1         | 399.56  | 571.22  | 1.43 | 0.32 | 514.74  | 236.86  | 0.46 | 0.00 |
| lactate dehydrogenase A                                                   | Ldha        | 1709.74 | 2420.81 | 1.42 | 0.51 | 1275.18 | 333.61  | 0.26 | 0.00 |
| O-linked N-acetylglucosamine (GlcNAc) transferase                         | Ogt         | 1086.16 | 1804.71 | 1.66 | 0.04 | 1818.34 | 1366.56 | 0.75 | 0.09 |
| 6-phosphofructo-2-kinase/fructose-2,6-biphosphatase 2                     | Pfkfb2      | 1241.43 | 852.71  | 0.69 | 0.26 | 2008.54 | 3648.90 | 1.82 | 0.00 |
| pyruvate kinase liver and red blood cell                                  | Pklr        | 149.73  | 154.74  | 1.03 | 1.00 | 133.42  | 218.33  | 1.64 | 0.04 |
| glutaminase 2 (liver, mitochondrial)                                      | Gls2        | 155.30  | 1009.46 | 6.50 | 0.01 | 1456.42 | 371.96  | 0.26 | 0.00 |
| solute carrier family 2 (facilitated glucose transporter), member 2       | Slc2a2      | 1760.88 | 819.98  | 0.47 | 0.05 | 2451.73 | 5046.61 | 2.06 | 0.07 |
| glucagon-like peptide 1 receptor                                          | Glp1r       | 233.49  | 183.19  | 0.78 | 0.77 | 968.53  | 1825.27 | 1.88 | 0.00 |
| glutamic pyruvic transaminase, soluble                                    | Gpt         | 107.16  | 125.84  | 1.17 | 0.82 | 591.21  | 192.21  | 0.33 | 0.00 |
| glutamic pyruvate transaminase (alanine aminotransferase) 2               | Gpt2        | 455.33  | 606.20  | 1.33 | 0.46 | 1378.41 | 653.81  | 0.47 | 0.00 |
| solute carrier family 2 (facilitated glucose transporter), member 1       | Slc2a1      | 1910.92 | 2218.12 | 1.16 | 0.74 | 1769.27 | 716.40  | 0.40 | 0.00 |
| solute carrier family 2 (facilitated glucose transporter), member 3       | Slc2a3      | 315.18  | 429.75  | 1.36 | 0.48 | 130.34  | 76.24   | 0.58 | 0.02 |
| <b>GLP1R AND cAMP SIGNALLING</b>                                          |             |         |         |      |      |         |         |      |      |
| adenylate cyclase 4                                                       | Adcy4       | 423.63  | 569.43  | 1.34 | 0.46 | 431.44  | 155.71  | 0.36 | 0.00 |
| adenylate cyclase 5                                                       | Adcy5       | 190.02  | 218.70  | 1.15 | 0.86 | 144.93  | 73.38   | 0.51 | 0.00 |
| glucagon-like peptide 1 receptor                                          | Glp1r       | 233.49  | 183.19  | 0.78 | 0.77 | 968.53  | 1825.27 | 1.88 | 0.00 |
| phosphodiesterase 10A                                                     | Pde10a      | 210.32  | 217.62  | 1.03 | 0.99 | 291.32  | 877.72  | 3.01 | 0.00 |
| phosphodiesterase 1C                                                      | Pde1c       | 460.11  | 320.88  | 0.70 | 0.67 | 260.23  | 470.34  | 1.81 | 0.00 |
| protein kinase, cAMP dependent, catalytic, beta                           | Prkacb      | 3242.47 | 2531.31 | 0.78 | 0.49 | 4647.11 | 7568.29 | 1.63 | 0.01 |
| protein kinase, cAMP dependent regulatory, type I beta                    | Prkar1b     | 1488.34 | 1343.43 | 0.90 | 0.87 | 1495.66 | 2904.30 | 1.94 | 0.00 |

|                                                         |         |        |        |      |      |         |         |      |      |
|---------------------------------------------------------|---------|--------|--------|------|------|---------|---------|------|------|
| protein kinase, cAMP dependent regulatory, type II beta | Prkar2b | 450.05 | 391.28 | 0.87 | 0.79 | 358.88  | 580.10  | 1.62 | 0.04 |
| Rap guanine nucleotide exchange factor (GEF) 3          | Rapgef3 | 223.53 | 268.16 | 1.20 | 0.76 | 300.86  | 160.13  | 0.53 | 0.02 |
| Rap guanine nucleotide exchange factor (GEF) 4          | Rapgef4 | 814.02 | 641.79 | 0.79 | 0.48 | 1067.09 | 1893.49 | 1.77 | 0.00 |

#### OXIDATIVE DAMAGE CONTROL

|                                                      |          |         |         |      |      |         |         |      |      |
|------------------------------------------------------|----------|---------|---------|------|------|---------|---------|------|------|
| catalase                                             | Cat      | 644.09  | 738.30  | 1.15 | 0.87 | 858.18  | 243.80  | 0.28 | 0.00 |
| cytoglobin                                           | Cygb     | 274.61  | 338.34  | 1.23 | 0.80 | 362.19  | 178.78  | 0.49 | 0.00 |
| glutaredoxin                                         | Glrx     | 235.99  | 173.51  | 0.74 | 0.41 | 171.55  | 297.70  | 1.74 | 0.01 |
| glutathione peroxidase 8                             | Gpx8     | 193.88  | 231.83  | 1.20 | 0.84 | 94.13   | 25.16   | 0.27 | 0.00 |
| glutathione S-transferase, alpha 4                   | Gsta4    | 168.64  | 176.54  | 1.05 | 0.99 | 158.01  | 18.69   | 0.12 | 0.04 |
| glutathione S-transferase kappa 1                    | Gstk1    | 52.71   | 87.60   | 1.66 | 0.25 | 249.87  | 88.52   | 0.35 | 0.00 |
| glutathione S-transferase, mu 1                      | Gstm1    | 683.00  | 909.94  | 1.33 | 0.42 | 1395.09 | 690.17  | 0.49 | 0.00 |
| glutathione S-transferase, mu 2                      | Gstm2    | 198.78  | 225.71  | 1.14 | 0.90 | 921.85  | 248.49  | 0.27 | 0.00 |
| glutathione S-transferase, mu 7                      | Gstm7    | 177.71  | 231.78  | 1.30 | 0.65 | 170.78  | 62.58   | 0.37 | 0.00 |
| glutathione S-transferase, pi 1                      | Gstp1    | 481.25  | 584.92  | 1.22 | 0.82 | 1684.32 | 464.02  | 0.28 | 0.00 |
| glutathione S-transferase, theta 1                   | Gstt1    | 259.96  | 265.45  | 1.02 | 1.00 | 544.92  | 286.42  | 0.53 | 0.00 |
| glutathione S-transferase, theta 2                   | Gstt2    | 167.86  | 214.47  | 1.28 | 0.70 | 309.19  | 173.24  | 0.56 | 0.04 |
| glutathione S-transferase, theta 3                   | Gstt3    | 84.79   | 103.39  | 1.22 | 0.84 | 315.09  | 65.43   | 0.21 | 0.00 |
| microsomal glutathione S-transferase 1               | Mgst1    | 706.87  | 529.74  | 0.75 | 0.44 | 263.17  | 53.03   | 0.20 | 0.00 |
| microsomal glutathione S-transferase 3               | Mgst3    | 305.71  | 275.01  | 0.90 | 0.91 | 290.02  | 158.48  | 0.55 | 0.00 |
| methionine sulfoxide reductase A                     | Msra     | 122.02  | 149.40  | 1.22 | 0.74 | 281.32  | 145.46  | 0.52 | 0.00 |
| methionine sulfoxide reductase B3                    | Msrb3    | 432.98  | 616.07  | 1.42 | 0.36 | 270.65  | 104.54  | 0.39 | 0.00 |
| peroxiredoxin 4                                      | Prdx4    | 830.57  | 1258.91 | 1.52 | 0.60 | 3971.03 | 968.36  | 0.24 | 0.00 |
| pyrroline-5-carboxylate reductase 1                  | Pycr1    | 186.94  | 440.98  | 2.36 | 0.04 | 1305.04 | 541.20  | 0.41 | 0.00 |
| quiescin Q6 sulfhydryl oxidase 1                     | Qsox1    | 1814.71 | 2165.70 | 1.19 | 0.67 | 3474.48 | 1835.35 | 0.53 | 0.00 |
| selenoprotein X 1                                    | Sepx1    | 292.32  | 349.96  | 1.20 | 0.74 | 1600.57 | 487.43  | 0.30 | 0.00 |
| SH3 domain binding glutamic acid-rich protein-like 3 | Sh3bgrl3 | 678.93  | 548.24  | 0.81 | 0.65 | 481.91  | 210.68  | 0.44 | 0.00 |
| superoxide dismutase 3                               | Sod3     | 173.46  | 193.69  | 1.12 | 0.93 | 125.01  | 53.72   | 0.43 | 0.06 |
| thioredoxin 1                                        | Txn1     | 2896.52 | 2456.31 | 0.85 | 0.74 | 2330.22 | 981.45  | 0.42 | 0.00 |
| thioredoxin reductase 1                              | Txnrd1   | 4264.44 | 6824.20 | 1.60 | 0.24 | 7862.32 | 4504.26 | 0.57 | 0.03 |
| thioredoxin reductase 3                              | Txnrd3   | 239.49  | 294.75  | 1.23 | 0.71 | 249.30  | 136.01  | 0.55 | 0.01 |

#### K+ CHANNELS

|                                                                                            |        |         |         |      |      |         |         |      |      |
|--------------------------------------------------------------------------------------------|--------|---------|---------|------|------|---------|---------|------|------|
| hyperpolarization-activated, cyclic nucleotide-gated K+ 3                                  | Hcn3   | 226.60  | 175.44  | 0.77 | 0.58 | 242.90  | 522.88  | 2.15 | 0.00 |
| hyperpolarization-activated, cyclic nucleotide-gated K+ 4                                  | Hcn4   | 148.06  | 135.73  | 0.92 | 0.95 | 147.40  | 329.78  | 2.24 | 0.00 |
| potassium voltage-gated channel, shaker-related subfamily, beta member 3                   | Kcnab3 | 102.34  | 75.10   | 0.73 | 0.74 | 151.68  | 249.15  | 1.64 | 0.04 |
| potassium voltage gated channel, Shab-related subfamily, member 2                          | Kcnb2  | 50.13   | 48.54   | 0.97 | 0.99 | 46.74   | 101.87  | 2.18 | 0.01 |
| potassium voltage-gated channel, subfamily H, member 1                                     | Kcnh1  | 53.93   | 67.14   | 1.25 | 0.83 | 175.65  | 450.81  | 2.57 | 0.00 |
| similar to potassium channel erg1a; potassium voltage-gated channel, subfamily H, member 2 | Kcnh2  | 1271.17 | 1010.53 | 0.79 | 0.60 | 856.64  | 1455.65 | 1.70 | 0.00 |
| potassium voltage-gated channel, subfamily H, member 6                                     | Kcnh6  | 612.02  | 459.67  | 0.75 | 0.42 | 623.43  | 1088.96 | 1.75 | 0.05 |
| Kv channel-interacting protein 1                                                           | Kcnp1  | 155.91  | 70.59   | 0.45 | 0.00 | 472.27  | 1078.33 | 2.28 | 0.00 |
| potassium inwardly rectifying channel, subfamily J, member 11                              | Kcnj11 | 1484.57 | 862.48  | 0.58 | 0.15 | 1176.74 | 2193.99 | 1.86 | 0.00 |
| potassium inwardly-rectifying channel, subfamily J, member 12                              | Kcnj12 | 40.95   | 38.40   | 0.94 | 0.98 | 74.54   | 132.08  | 1.77 | 0.05 |
| potassium inwardly-rectifying channel, subfamily J, member 6                               | Kcnj6  | 27.55   | 18.07   | 0.66 | 0.64 | 66.79   | 150.28  | 2.25 | 0.01 |
| potassium channel, subfamily K, member 12                                                  | Kcnk12 | 118.96  | 92.42   | 0.78 | 0.72 | 206.87  | 421.18  | 2.04 | 0.00 |
| potassium channel, subfamily K, member 16                                                  | Kcnk16 | 1047.64 | 767.25  | 0.73 | 0.30 | 961.82  | 1810.23 | 1.88 | 0.00 |
| potassium large conductance calcium-activated channel, subfamily M, alpha member 1         | Kcnma1 | 313.22  | 292.93  | 0.94 | 0.98 | 317.25  | 779.28  | 2.46 | 0.00 |
| potassium large conductance calcium-activated channel, subfamily M, beta member 2          | Kcnmb2 | 671.87  | 463.36  | 0.69 | 0.63 | 724.60  | 1241.41 | 1.71 | 0.01 |

|                                                                                           |        |         |         |      |      |         |         |      |      |
|-------------------------------------------------------------------------------------------|--------|---------|---------|------|------|---------|---------|------|------|
| potassium intermediate/small conductance calcium-activated channel, subfamily N, member 3 | Kcnn3  | 33.53   | 44.53   | 1.33 | 0.74 | 176.51  | 325.11  | 1.84 | 0.06 |
| potassium channel tetramerisation domain containing 18                                    | Kctd18 | 286.56  | 300.84  | 1.05 | 0.98 | 337.17  | 698.60  | 2.07 | 0.00 |
| potassium channel tetramerisation domain containing 20                                    | Kctd20 | 2749.00 | 2307.58 | 0.84 | 0.71 | 2675.31 | 4563.21 | 1.71 | 0.00 |
| potassium channel tetramerisation domain containing 8                                     | Kctd8  | 69.11   | 43.02   | 0.62 | 0.51 | 44.79   | 122.61  | 2.74 | 0.00 |

### Ca2+ CHANNELS

|                                                                    |         |         |         |      |      |         |         |      |      |
|--------------------------------------------------------------------|---------|---------|---------|------|------|---------|---------|------|------|
| calcium channel, voltage-dependent, L type, alpha 1C subunit       | Cacna1c | 347.03  | 396.41  | 1.14 | 0.85 | 496.10  | 953.01  | 1.92 | 0.00 |
| calcium channel, voltage-dependent, L type, alpha 1D subunit       | Cacna1d | 1135.16 | 1033.35 | 0.91 | 0.97 | 1270.07 | 2159.31 | 1.70 | 0.00 |
| calcium channel, voltage-dependent, beta 2 subunit                 | Cacnb2  | 332.73  | 235.83  | 0.71 | 0.54 | 390.87  | 732.62  | 1.87 | 0.00 |
| transient receptor potential cation channel, subfamily C, member 1 | Trpc1   | 427.25  | 458.20  | 1.07 | 0.97 | 482.32  | 786.61  | 1.63 | 0.00 |
| transient receptor potential cation channel, subfamily C, member 4 | Trpc4   | 29.37   | 30.88   | 1.05 | 0.99 | 55.70   | 102.80  | 1.85 | 0.04 |

### EXOCYTOSIS AND REGULATION

|                                                    |         |         |         |      |      |         |         |      |      |
|----------------------------------------------------|---------|---------|---------|------|------|---------|---------|------|------|
| adenosine A2b receptor                             | Adora2b | 113.91  | 47.31   | 0.42 | 0.00 | 107.03  | 454.89  | 4.25 | 0.00 |
| adenosine A3 receptor                              | Adora3  | 28.15   | 16.03   | 0.57 | 0.52 | 124.28  | 203.31  | 1.64 | 0.06 |
| Ca2+-dependent secretion activator                 | Cadps   | 955.71  | 973.65  | 1.02 | 1.00 | 1197.44 | 1979.18 | 1.65 | 0.01 |
| complexin 2                                        | Cplx2   | 4509.18 | 3264.98 | 0.72 | 0.41 | 2961.47 | 4939.92 | 1.67 | 0.01 |
| cortactin binding protein 2                        | Cttnbp2 | 94.35   | 139.66  | 1.48 | 0.34 | 291.72  | 652.19  | 2.24 | 0.00 |
| glucagon receptor                                  | Gcgr    | 523.92  | 244.91  | 0.47 | 0.14 | 319.01  | 569.92  | 1.79 | 0.00 |
| glycine receptor, beta subunit                     | Glr3    | 27.78   | 31.82   | 1.15 | 0.92 | 264.13  | 465.59  | 1.76 | 0.02 |
| golgi autoantigen, golgin subfamily a, 7B          | Gnpda1  | 150.93  | 156.19  | 1.03 | 0.99 | 258.20  | 496.28  | 1.92 | 0.00 |
| myosin VIIA and Rab interacting protein            | Myrip   | 96.16   | 194.58  | 2.02 | 0.03 | 218.72  | 116.38  | 0.53 | 0.01 |
| piccolo (presynaptic cytomatrix protein)           | Pclo    | 816.55  | 698.07  | 0.85 | 0.93 | 1080.70 | 2056.36 | 1.90 | 0.00 |
| RAB26, member RAS oncogene family                  | Rab26   | 49.78   | 150.68  | 3.03 | 0.01 | 443.05  | 111.80  | 0.25 | 0.00 |
| RAB27A, member RAS oncogene family                 | Rab27a  | 2323.10 | 1392.91 | 0.60 | 0.36 | 2071.42 | 3456.28 | 1.67 | 0.00 |
| RAB3B, member RAS oncogene family                  | Rab3b   | 534.11  | 450.48  | 0.84 | 0.88 | 281.78  | 498.81  | 1.77 | 0.00 |
| Rap guanine nucleotide exchange factor (GEF) 4     | Rapgef4 | 814.02  | 641.79  | 0.79 | 0.48 | 1067.09 | 1893.49 | 1.77 | 0.00 |
| regulating synaptic membrane exocytosis 2          | Rims2   | 387.80  | 395.06  | 1.02 | 1.00 | 434.40  | 810.23  | 1.87 | 0.00 |
| secretory carrier membrane protein 5               | Scamp5  | 614.92  | 494.36  | 0.80 | 0.56 | 500.92  | 869.85  | 1.74 | 0.00 |
| Sec1 family domain containing 1                    | Scfd1   | 1316.50 | 1265.05 | 0.96 | 0.98 | 2334.38 | 3724.89 | 1.60 | 0.00 |
| secernin 1                                         | Scrn1   | 587.81  | 479.45  | 0.82 | 0.59 | 698.96  | 1193.19 | 1.71 | 0.02 |
| synaptosomal-associated protein 25                 | Snap25  | 1459.75 | 1316.30 | 0.90 | 0.85 | 1272.61 | 2288.34 | 1.80 | 0.00 |
| six transmembrane epithelial antigen of prostate 2 | Steap2  | 271.13  | 265.73  | 0.98 | 1.00 | 359.56  | 657.39  | 1.83 | 0.01 |
| syntaxin binding protein 1                         | Stxbp1  | 2285.93 | 1937.72 | 0.85 | 0.68 | 2535.29 | 4318.75 | 1.70 | 0.00 |
| syntaxin binding protein 5-like                    | Stxbp5l | 262.20  | 241.47  | 0.92 | 0.94 | 239.34  | 516.45  | 2.16 | 0.00 |
| synaptophysin                                      | Syp     | 2412.60 | 1660.41 | 0.69 | 0.13 | 2299.96 | 4483.25 | 1.95 | 0.00 |
| synaptotagmin IV                                   | Syt4    | 315.09  | 348.90  | 1.11 | 0.86 | 1387.84 | 3956.53 | 2.85 | 0.00 |
| synaptotagmin-like 4                               | Syt4    | 3331.31 | 1451.69 | 0.44 | 0.18 | 2702.49 | 5901.24 | 2.18 | 0.00 |

### SECRETORY GRANULE

|                                               |       |           |           |      |      |           |            |      |      |
|-----------------------------------------------|-------|-----------|-----------|------|------|-----------|------------|------|------|
| actinin, alpha 1                              | Actn1 | 2938.73   | 5699.28   | 1.94 | 0.02 | 4079.97   | 1749.31    | 0.43 | 0.00 |
| CUB and zona pellucida-like domains 1         | Cuzd1 | 402.35    | 2717.35   | 6.75 | 0.00 | 25545.73  | 5293.98    | 0.21 | 0.00 |
| deleted in malignant brain tumors 1           | Dmbt1 | 4098.16   | 20393.29  | 4.98 | 0.17 | 120399.88 | 28998.81   | 0.24 | 0.00 |
| heat shock protein 1                          | Hspd1 | 4935.62   | 7727.60   | 1.57 | 0.07 | 8897.40   | 12100.40   | 1.36 | 0.15 |
| insulin I                                     | Ins1  | 257147.71 | 102466.10 | 0.40 | 0.07 | 307185.00 | 595075.56  | 1.94 | 0.00 |
| insulin II                                    | Ins2  | 405780.89 | 148466.18 | 0.37 | 0.08 | 764479.22 | 1559674.83 | 2.04 | 0.00 |
| proprotein convertase subtilisin/kexin type 1 | Pcsk1 | 3373.35   | 1622.84   | 0.48 | 0.12 | 2685.91   | 5645.04    | 2.10 | 0.00 |

|                                                 |         |          |         |      |      |          |          |      |      |
|-------------------------------------------------|---------|----------|---------|------|------|----------|----------|------|------|
| phosphoinositide kinase, FYVE finger containing | Pikfyve | 276.50   | 429.87  | 1.55 | 0.25 | 434.30   | 752.47   | 1.73 | 0.00 |
| RAB37, member of RAS oncogene family            | Rab37   | 1124.05  | 619.08  | 0.55 | 0.00 | 914.47   | 1606.56  | 1.76 | 0.00 |
| Rac GTPase-activating protein 1                 | Racgap1 | 601.26   | 508.95  | 0.85 | 0.77 | 122.10   | 232.27   | 1.90 | 0.00 |
| rabphilin 3A-like                               | Rph3al  | 2141.03  | 1369.35 | 0.64 | 0.04 | 1600.21  | 2330.37  | 1.46 | 0.04 |
| secretogranin III                               | Scg3    | 10606.08 | 5252.79 | 0.50 | 0.22 | 10386.89 | 19149.90 | 1.84 | 0.00 |
| secretogranin V                                 | Scg5    | 2935.02  | 1855.81 | 0.63 | 0.03 | 4919.67  | 8112.66  | 1.65 | 0.01 |
| selectin, platelet                              | Selp    | 1147.65  | 3576.18 | 3.12 | 0.00 | 4018.85  | 48.34    | 0.01 | 0.05 |
| transmembrane domain trafficking protein 2      | Tmed2   | 678.84   | 491.54  | 0.72 | 0.59 | 927.77   | 358.96   | 0.39 | 0.00 |
