# Supplementary material for: Aldehyde dehydrogenase activity is necessary for beta cell development and functionality in mice
Source: PubMed Central journal article supplement (PMC4670456; doi:10.1007/s00125-015-3784-4), 2015-10-31
Supplement: 125_2015_3784_MOESM9_ESM.pdf [file 125_2015_3784_MOESM9_ESM.pdf]

**ESM Table 2** List of regulated genes by functional category appearing in the heat maps of ESM Figure 5

| FULL GENE NAME                                                                 | GENE SYMBOL | WT P1    | NULL P1 | FOLD | Padj | WT WK8   | MUT WK8  | FOLD | Padj |
|--------------------------------------------------------------------------------|-------------|----------|---------|------|------|----------|----------|------|------|
| <b>CELL CYCLE ASSOCIATED GENES</b>                                             |             |          |         |      |      |          |          |      |      |
| adenylate cyclase 3                                                            | Adcy3       | 168.71   | 214.57  | 1.27 | 0.67 | 146.77   | 247.37   | 1.69 | 0.07 |
| ankyrin repeat domain 54                                                       | Ankrd54     | 1148.00  | 742.46  | 0.65 | 0.06 | 804.25   | 1325.93  | 1.65 | 0.00 |
| ataxia telangiectasia mutated homolog                                          | Atm         | 365.14   | 336.95  | 0.92 | 0.92 | 415.42   | 664.83   | 1.60 | 0.06 |
| cyclin-dependent kinase inhibitor 1A (p21)                                     | Cdkn1a      | 4622.79  | 5057.97 | 1.09 | 0.87 | 4339.83  | 2019.71  | 0.47 | 0.00 |
| cyclin-dependent kinase inhibitor 2B (p15)                                     | Cdkn2b      | 130.27   | 95.16   | 0.73 | 0.55 | 161.32   | 264.16   | 1.64 | 0.03 |
| centrosomal protein 120                                                        | Cep120      | 865.11   | 934.70  | 1.08 | 0.90 | 947.06   | 1641.32  | 1.73 | 0.00 |
| centrobin, centrosomal BRCA2 interacting protein                               | Cntrob      | 319.50   | 262.63  | 0.82 | 0.67 | 277.31   | 462.75   | 1.67 | 0.01 |
| cytoplasmic polyadenylation element binding protein 1                          | Cpeb1       | 282.22   | 265.62  | 0.94 | 0.97 | 773.47   | 1522.79  | 1.97 | 0.00 |
| dystonin                                                                       | Dst         | 2553.99  | 2811.22 | 1.10 | 0.89 | 3518.55  | 5697.57  | 1.62 | 0.00 |
| formin 2                                                                       | Fmn2        | 1291.41  | 699.67  | 0.54 | 0.52 | 1213.62  | 2034.36  | 1.68 | 0.00 |
| forkhead box C1                                                                | Foxc1       | 138.34   | 143.88  | 1.04 | 1.00 | 106.34   | 34.34    | 0.32 | 0.00 |
| growth arrest specific 2                                                       | Gas2        | 270.46   | 243.15  | 0.90 | 0.89 | 178.69   | 400.23   | 2.24 | 0.00 |
| MAD2L1 binding protein                                                         | Mad2l1bp    | 140.20   | 128.40  | 0.92 | 0.93 | 191.67   | 96.20    | 0.50 | 0.00 |
| meiosis-specific nuclear structural protein 1                                  | Mns1        | 168.53   | 121.49  | 0.72 | 0.37 | 278.52   | 747.79   | 2.68 | 0.00 |
| myosin XVI                                                                     | Myo16       | 19.97    | 90.33   | 4.52 | 0.00 | 209.41   | 52.90    | 0.25 | 0.00 |
| polo-like kinase 3                                                             | Plk3        | 1135.51  | 884.67  | 0.78 | 0.59 | 1615.27  | 2844.61  | 1.76 | 0.01 |
| Ras association domain family member 4                                         | Rassf4      | 267.67   | 233.76  | 0.87 | 0.92 | 207.85   | 410.32   | 1.97 | 0.00 |
| regulator of chromosome condensation (RCC1) and BTB (POZ) domain containing pr | Rcbtb1      | 750.48   | 645.54  | 0.86 | 0.80 | 904.74   | 1553.58  | 1.72 | 0.00 |
| REC8 homolog                                                                   | Rec8        | 145.21   | 81.47   | 0.56 | 0.04 | 267.30   | 486.45   | 1.82 | 0.10 |
| ras homolog gene family, member B                                              | Rhob        | 5554.69  | 5428.88 | 0.98 | 0.99 | 5037.73  | 2738.80  | 0.54 | 0.00 |
| replication protein A1                                                         | Rpa1        | 832.11   | 793.51  | 0.95 | 0.96 | 746.30   | 1205.29  | 1.62 | 0.00 |
| radial spoke head 1 homolog                                                    | Rsph1       | 92.12    | 39.26   | 0.43 | 0.09 | 52.65    | 102.44   | 1.95 | 0.07 |
| sestrin 3                                                                      | Sesn3       | 634.04   | 533.87  | 0.84 | 0.71 | 423.12   | 922.43   | 2.18 | 0.00 |
| TSPY-like 2                                                                    | Tsply2      | 1143.19  | 1017.52 | 0.89 | 0.82 | 1475.26  | 2486.79  | 1.69 | 0.00 |
| <b>MITOSIS ASSOCIATED GENES</b>                                                |             |          |         |      |      |          |          |      |      |
| cyclin G2                                                                      | Ccng2       | 893.53   | 772.96  | 0.87 | 0.75 | 520.14   | 999.47   | 1.92 | 0.01 |
| centrosomal protein 192                                                        | Cep192      | 271.59   | 377.92  | 1.39 | 0.48 | 240.33   | 386.05   | 1.61 | 0.02 |
| checkpoint kinase 1 homolog                                                    | Chek1       | 137.28   | 258.26  | 1.88 | 0.23 | 134.22   | 253.83   | 1.89 | 0.03 |
| cytoskeleton associated protein 5                                              | Ckap5       | 1192.54  | 1130.48 | 0.95 | 0.95 | 789.74   | 1300.85  | 1.65 | 0.00 |
| CLIP associating protein 2                                                     | Clasp2      | 1003.78  | 1219.46 | 1.21 | 0.61 | 1086.25  | 1824.08  | 1.68 | 0.00 |
| microtubule-associated protein 9                                               | Mtap9       | 489.29   | 404.79  | 0.83 | 0.67 | 407.26   | 692.08   | 1.70 | 0.00 |
| nuclear distribution gene C homolog                                            | Nudc        | 1751.90  | 1438.88 | 0.82 | 0.61 | 2199.90  | 3616.36  | 1.64 | 0.00 |
| protein phosphatase 2, regulatory subunit B                                    | Ppp2r3a     | 679.89   | 651.76  | 0.96 | 0.99 | 556.33   | 1063.94  | 1.91 | 0.00 |
| ribosomal protein S6 kinase, polypeptide 2                                     | Rps6ka2     | 849.77   | 751.01  | 0.88 | 0.85 | 797.54   | 1589.04  | 1.99 | 0.00 |
| SPC25, NDC80 kinetochore complex component                                     | Spc25       | 701.99   | 372.76  | 0.53 | 0.11 | 1852.02  | 3833.02  | 2.07 | 0.00 |
| <b>K+ AND Ca2+ TRANSPORT</b>                                                   |             |          |         |      |      |          |          |      |      |
| ATPase, Ca++ transporting, cardiac muscle, slow twitch 2                       | Atp2a2      | 10004.90 | 9441.32 | 0.94 | 0.93 | 14333.98 | 25427.53 | 1.77 | 0.00 |
| ATPase, Ca++ transporting, ubiquitous                                          | Atp2a3      | 4171.28  | 2214.10 | 0.53 | 0.05 | 6450.54  | 11008.38 | 1.71 | 0.08 |
| ATPase, Ca++ transporting, plasma membrane 2                                   | Atp2b2      | 131.90   | 112.75  | 0.85 | 0.81 | 354.89   | 626.84   | 1.77 | 0.02 |

|                                                                               |         |        |        |      |      |         |         |      |      |
|-------------------------------------------------------------------------------|---------|--------|--------|------|------|---------|---------|------|------|
| ATPase, H <sup>+</sup> /K <sup>+</sup> exchanging, gastric, alpha polypeptide | Atp4a   | 144.38 | 75.63  | 0.52 | 0.05 | 63.48   | 139.77  | 2.20 | 0.03 |
| solute carrier family 12, member 7                                            | Slc12a7 | 995.76 | 882.09 | 0.89 | 0.88 | 1095.83 | 1931.18 | 1.76 | 0.00 |
| solute carrier family 24 (sodium/potassium/calcium exchanger), member 2       | Slc24a2 | 330.34 | 261.50 | 0.79 | 0.79 | 919.87  | 1745.96 | 1.90 | 0.01 |
| solute carrier family 24 (sodium/potassium/calcium exchanger), member 3       | Slc24a3 | 45.73  | 77.79  | 1.70 | 0.53 | 65.48   | 26.83   | 0.41 | 0.02 |
| solute carrier family 24 (sodium/potassium/calcium exchanger), member 6       | Slc24a6 | 148.04 | 130.23 | 0.88 | 0.88 | 238.20  | 106.20  | 0.45 | 0.01 |
| solute carrier family 8 (sodium/calcium exchanger), member 1                  | Slc8a1  | 246.83 | 339.41 | 1.38 | 0.55 | 190.95  | 379.41  | 1.99 | 0.00 |

#### CYTOPLASMIC VESICLE

|                                                                          |         |         |          |      |      |           |          |      |      |
|--------------------------------------------------------------------------|---------|---------|----------|------|------|-----------|----------|------|------|
| ALS2 C-terminal like                                                     | Als2cl  | 416.49  | 687.82   | 1.65 | 0.08 | 644.63    | 216.67   | 0.34 | 0.00 |
| amphiphysin                                                              | Amph    | 125.96  | 160.81   | 1.28 | 0.66 | 275.80    | 505.16   | 1.83 | 0.00 |
| adaptor-related protein complex 1, sigma 2 subunit                       | Ap1s2   | 2100.76 | 1611.76  | 0.77 | 0.56 | 2344.67   | 3926.50  | 1.67 | 0.00 |
| adaptor-related protein complex 3, beta 2 subunit                        | Ap3b2   | 954.07  | 705.70   | 0.74 | 0.29 | 1117.71   | 2217.80  | 1.98 | 0.00 |
| ataxia telangiectasia mutated homolog (human)                            | Atm     | 365.14  | 336.95   | 0.92 | 0.92 | 415.42    | 664.83   | 1.60 | 0.06 |
| ATPase, Cu <sup>++</sup> transporting, alpha polypeptide                 | Atp7a   | 482.95  | 582.24   | 1.21 | 0.88 | 481.22    | 1006.43  | 2.09 | 0.00 |
| ATPase, aminophospholipid transporter (APLT), class I, type 8A, member 1 | Atp8a1  | 292.98  | 435.35   | 1.49 | 0.26 | 483.75    | 826.64   | 1.71 | 0.00 |
| coiled coil domain containing 88A                                        | Ccdc88a | 596.02  | 713.18   | 1.20 | 0.72 | 657.59    | 1073.27  | 1.63 | 0.00 |
| cystic fibrosis transmembrane conductance regulator homolog              | Cfr     | 54.18   | 145.32   | 2.68 | 0.01 | 132.02    | 20.33    | 0.15 | 0.00 |
| cysteine-rich hydrophobic domain 1                                       | Chic1   | 1457.31 | 875.98   | 0.60 | 0.20 | 2270.46   | 4825.41  | 2.13 | 0.00 |
| disabled homolog 2 (Drosophila)                                          | Dab2    | 365.42  | 647.84   | 1.77 | 0.04 | 416.60    | 200.95   | 0.48 | 0.13 |
| dystonin; hypothetical protein LOC100047109                              | Dst     | 2553.99 | 2811.22  | 1.10 | 0.89 | 3518.55   | 5697.57  | 1.62 | 0.00 |
| epidermal growth factor receptor                                         | Egfr    | 137.36  | 348.46   | 2.54 | 0.04 | 563.12    | 489.81   | 0.87 | 0.70 |
| gamma-glutamyl hydrolase                                                 | Ggh     | 365.57  | 814.69   | 2.23 | 0.05 | 4827.37   | 1084.02  | 0.22 | 0.00 |
| glutamate receptor, ionotropic, NMDA1 (zeta 1)                           | Grin1   | 282.39  | 212.99   | 0.75 | 0.63 | 386.77    | 728.57   | 1.88 | 0.00 |
| glutamate receptor interacting protein 1                                 | Grip1   | 250.35  | 181.97   | 0.73 | 0.56 | 175.35    | 335.00   | 1.91 | 0.00 |
| huntingtin-associated protein 1                                          | Hap1    | 3421.98 | 2607.33  | 0.76 | 0.35 | 2732.42   | 4436.67  | 1.62 | 0.00 |
| myosin, heavy polypeptide 11, smooth muscle                              | Myh11   | 261.96  | 599.96   | 2.29 | 0.00 | 864.02    | 378.48   | 0.44 | 0.00 |
| myosin VIIA and Rab interacting protein                                  | Myrip   | 96.16   | 194.58   | 2.02 | 0.03 | 218.72    | 116.38   | 0.53 | 0.01 |
| secretagogin, EF-hand calcium binding protein                            | Scgn    | 3188.74 | 1811.28  | 0.57 | 0.05 | 2153.86   | 3116.62  | 1.45 | 0.05 |
| serum/glucocorticoid regulated kinase 3                                  | Sgk3    | 308.76  | 247.03   | 0.80 | 0.79 | 211.27    | 353.41   | 1.67 | 0.02 |
| SH3-domain kinase binding protein 1                                      | Sh3kbp1 | 330.31  | 289.19   | 0.88 | 0.83 | 318.04    | 530.70   | 1.67 | 0.01 |
| solute carrier family 30 (zinc transporter), member 8                    | Slc30a8 | 3733.76 | 2459.37  | 0.66 | 0.44 | 5563.65   | 10454.67 | 1.88 | 0.00 |
| synaptic vesicle glycoprotein 2 a                                        | Sv2a    | 686.50  | 513.47   | 0.75 | 0.34 | 758.16    | 1341.49  | 1.77 | 0.01 |
| syncollin                                                                | Sycn    | 3420.37 | 16133.12 | 4.72 | 0.04 | 143907.40 | 27347.08 | 0.19 | 0.00 |
| synapsin I                                                               | Syn1    | 398.32  | 371.97   | 0.93 | 0.96 | 471.65    | 901.43   | 1.91 | 0.00 |
| synaptoporin                                                             | Synpr   | 153.69  | 96.21    | 0.63 | 0.14 | 161.97    | 368.41   | 2.27 | 0.00 |
| synaptotagmin XII                                                        | Syt12   | 53.58   | 119.91   | 2.24 | 0.07 | 54.59     | 20.29    | 0.37 | 0.01 |
| synaptotagmin XIII                                                       | Syt13   | 7508.77 | 4043.95  | 0.54 | 0.16 | 6353.84   | 12710.86 | 2.00 | 0.00 |
| synaptotagmin V                                                          | Syt5    | 399.79  | 245.00   | 0.61 | 0.05 | 311.87    | 534.09   | 1.71 | 0.01 |
| synaptotagmin VII                                                        | Syt7    | 2972.81 | 2095.14  | 0.70 | 0.59 | 2318.69   | 4142.44  | 1.79 | 0.00 |
| tyrosine hydroxylase                                                     | Th      | 203.57  | 208.87   | 1.03 | 1.00 | 317.30    | 574.06   | 1.81 | 0.07 |

#### GTPase REGULATORY ACTIVITY

|                                                           |          |         |         |      |      |         |         |      |      |
|-----------------------------------------------------------|----------|---------|---------|------|------|---------|---------|------|------|
| ArfGAP with dual PH domains 2                             | Adap2    | 83.38   | 112.68  | 1.35 | 0.72 | 344.51  | 115.31  | 0.33 | 0.00 |
| A kinase (PRKA) anchor protein 13                         | Akap13   | 1231.81 | 1916.57 | 1.56 | 0.14 | 2052.46 | 3398.81 | 1.66 | 0.00 |
| ALS2 C-terminal like                                      | Als2cl   | 416.49  | 687.82  | 1.65 | 0.08 | 644.63  | 216.67  | 0.34 | 0.00 |
| ArfGAP with RhoGAP domain, ankyrin repeat and PH domain 2 | Arap2    | 249.90  | 451.23  | 1.81 | 0.05 | 391.01  | 84.76   | 0.22 | 0.00 |
| ArfGAP with RhoGAP domain, ankyrin repeat and PH domain 3 | Arap3    | 905.55  | 1075.80 | 1.19 | 0.71 | 676.47  | 383.53  | 0.57 | 0.00 |
| Rho GTPase activating protein 10                          | Arhgap10 | 224.71  | 288.90  | 1.29 | 0.65 | 263.40  | 86.19   | 0.33 | 0.00 |

|                                                                                 |           |         |          |      |      |          |         |      |      |
|---------------------------------------------------------------------------------|-----------|---------|----------|------|------|----------|---------|------|------|
| Rho GTPase activating protein 11A                                               | Arhgap11a | 360.18  | 337.63   | 0.94 | 0.95 | 67.28    | 118.11  | 1.76 | 0.03 |
| Rho GTPase activating protein 27                                                | Arhgap27  | 340.95  | 373.62   | 1.10 | 0.93 | 284.25   | 107.60  | 0.38 | 0.00 |
| Rho GTPase activating protein 28                                                | Arhgap28  | 328.74  | 601.72   | 1.83 | 0.15 | 268.85   | 47.74   | 0.18 | 0.00 |
| CDC42 GTPase-activating protein                                                 | Arhgap31  | 673.02  | 851.31   | 1.26 | 0.65 | 600.93   | 340.53  | 0.57 | 0.00 |
| Rho GDP dissociation inhibitor (GDI) gamma                                      | Arhgdig   | 2885.81 | 10034.80 | 3.48 | 0.09 | 51286.39 | 9267.64 | 0.18 | 0.00 |
| Rho guanine nucleotide exchange factor (GEF) 10-like                            | Arhgef10l | 470.35  | 630.65   | 1.34 | 0.45 | 566.47   | 253.21  | 0.45 | 0.00 |
| Rho guanine nucleotide exchange factor (GEF) 15                                 | Arhgef15  | 342.54  | 361.55   | 1.06 | 0.98 | 231.30   | 99.47   | 0.43 | 0.00 |
| Rho guanine nucleotide exchange factor (GEF) 19                                 | Arhgef19  | 189.84  | 215.84   | 1.14 | 0.89 | 339.95   | 171.56  | 0.50 | 0.01 |
| ArfGAP with SH3 domain, ankyrin repeat and PH domain 3 similar to choroideremia | Asap3     | 110.88  | 220.34   | 1.99 | 0.04 | 208.45   | 87.73   | 0.42 | 0.09 |
| cytohesin 3                                                                     | Chm       | 426.14  | 442.65   | 1.04 | 0.99 | 447.53   | 718.70  | 1.61 | 0.01 |
| deleted in liver cancer 1                                                       | Cyth3     | 1369.01 | 1559.72  | 1.14 | 0.82 | 806.54   | 467.14  | 0.58 | 0.00 |
| dedicator of cytokinesis 1                                                      | Dlc1      | 1165.73 | 1647.67  | 1.41 | 0.32 | 1206.91  | 619.68  | 0.51 | 0.00 |
| dedicator of cytokinesis 10                                                     | Dock1     | 949.03  | 1383.70  | 1.46 | 0.31 | 748.58   | 372.59  | 0.50 | 0.01 |
| dedicator of cytokinesis 4                                                      | Dock10    | 221.68  | 376.18   | 1.70 | 0.33 | 306.61   | 560.72  | 1.83 | 0.00 |
| dedicator of cytokinesis 5                                                      | Dock4     | 197.55  | 421.37   | 2.13 | 0.04 | 195.16   | 114.80  | 0.59 | 0.03 |
| ect2 oncogene                                                                   | Dock5     | 190.21  | 381.04   | 2.00 | 0.18 | 440.82   | 217.29  | 0.49 | 0.00 |
| exophilin 5                                                                     | Ect2      | 285.17  | 276.46   | 0.97 | 0.99 | 58.72    | 149.89  | 2.55 | 0.00 |
| FYVE, RhoGEF and PH domain containing 3                                         | Exph5     | 211.14  | 210.88   | 1.00 | 1.00 | 462.23   | 844.14  | 1.83 | 0.00 |
| FYVE, RhoGEF and PH domain containing 5                                         | Fgd3      | 1705.16 | 2523.29  | 1.48 | 0.51 | 918.56   | 112.55  | 0.12 | 0.00 |
| GH regulated TBC protein 1                                                      | Fgd5      | 439.06  | 534.36   | 1.22 | 0.73 | 306.74   | 157.98  | 0.52 | 0.01 |
| IQ motif containing GTPase activating protein 2                                 | Grtp1     | 312.39  | 202.24   | 0.65 | 0.13 | 285.53   | 496.23  | 1.74 | 0.01 |
| IQ motif and Sec7 domain 1                                                      | Iqgap2    | 339.14  | 510.94   | 1.51 | 0.30 | 635.88   | 256.55  | 0.40 | 0.00 |
| MAP-kinase activating death domain                                              | Iqsec1    | 602.23  | 773.03   | 1.28 | 0.62 | 485.93   | 225.49  | 0.46 | 0.00 |
| myosin VIIA and Rab interacting protein                                         | Madd      | 1544.51 | 1105.23  | 0.72 | 0.19 | 2184.89  | 3913.41 | 1.79 | 0.00 |
| neuroepithelial cell transforming gene 1                                        | Myrip     | 96.16   | 194.58   | 2.02 | 0.03 | 218.72   | 116.38  | 0.53 | 0.01 |
| neuronal guanine nucleotide exchange factor                                     | Net1      | 473.51  | 606.19   | 1.28 | 0.56 | 513.43   | 225.95  | 0.44 | 0.00 |
| phospholipase C, epsilon 1                                                      | Ngef      | 249.18  | 281.23   | 1.13 | 0.87 | 183.43   | 62.99   | 0.34 | 0.00 |
| pleckstrin homology domain containing, family G (with RhoGef domain) member 2   | Plice1    | 289.17  | 502.43   | 1.74 | 0.14 | 285.27   | 131.68  | 0.46 | 0.00 |
| Rho GTPase activating protein 8                                                 | Plekhg2   | 999.69  | 1274.09  | 1.27 | 0.56 | 518.35   | 203.95  | 0.39 | 0.00 |
| rabaptin, RAB GTPase binding effector protein 1                                 | Prr5      | 194.55  | 237.48   | 1.22 | 0.77 | 145.45   | 78.42   | 0.54 | 0.02 |
| Rac GTPase-activating protein 1                                                 | Rabep1    | 1140.65 | 1221.85  | 1.07 | 0.92 | 1148.33  | 1872.42 | 1.63 | 0.00 |
| Rap1 GTPase-activating protein                                                  | Racgap1   | 601.26  | 508.95   | 0.85 | 0.77 | 122.10   | 232.27  | 1.90 | 0.00 |
| Rap guanine nucleotide exchange factor (GEF) 3                                  | Rap1gap   | 1982.95 | 4663.71  | 2.35 | 0.06 | 7269.52  | 2126.48 | 0.29 | 0.00 |
| Rap guanine nucleotide exchange factor (GEF) 4                                  | Rapgef3   | 223.53  | 268.16   | 1.20 | 0.76 | 300.86   | 160.13  | 0.53 | 0.02 |
| Rap guanine nucleotide exchange factor (GEF) 5                                  | Rapgef4   | 814.02  | 641.79   | 0.79 | 0.48 | 1067.09  | 1893.49 | 1.77 | 0.00 |
| RAS p21 protein activator 4                                                     | Rapgef5   | 272.47  | 437.07   | 1.60 | 0.27 | 597.46   | 215.47  | 0.36 | 0.00 |
| RAS protein-specific guanine nucleotide-releasing factor 1                      | Rasa4     | 193.61  | 197.42   | 1.02 | 1.00 | 161.42   | 65.92   | 0.41 | 0.01 |
| RAS, guanyl releasing protein 2                                                 | Rasgrf1   | 335.58  | 190.72   | 0.57 | 0.21 | 366.38   | 917.44  | 2.50 | 0.00 |
| ral guanine nucleotide dissociation stimulator,-like 1                          | Rasgrp2   | 202.36  | 208.58   | 1.03 | 1.00 | 154.56   | 54.94   | 0.36 | 0.00 |
| regulator of G-protein signaling 17                                             | Rgl1      | 694.46  | 823.67   | 1.19 | 0.71 | 603.18   | 982.48  | 1.63 | 0.00 |
| resistance to inhibitors of cholinesterase 8 homolog B                          | Rgs17     | 485.30  | 368.87   | 0.76 | 0.48 | 165.73   | 391.68  | 2.36 | 0.00 |
| regulating synaptic membrane exocytosis 2                                       | Ric8b     | 632.75  | 583.52   | 0.92 | 0.90 | 866.01   | 1515.45 | 1.75 | 0.00 |
| Ras and Rab interactor 1                                                        | Rims2     | 387.80  | 395.06   | 1.02 | 1.00 | 434.40   | 810.23  | 1.87 | 0.00 |
| Ras and Rab interactor 3                                                        | Rin1      | 114.27  | 237.72   | 2.08 | 0.14 | 207.38   | 43.64   | 0.21 | 0.00 |
| retinitis pigmentosa GTPase regulator                                           | Rin3      | 194.32  | 232.85   | 1.20 | 0.81 | 163.30   | 79.56   | 0.49 | 0.05 |
| rhotekin                                                                        | Rpgr      | 296.04  | 232.79   | 0.79 | 0.64 | 208.55   | 382.47  | 1.83 | 0.01 |
| small G protein signaling modulator 1                                           | Rtkn      | 379.60  | 450.82   | 1.19 | 0.75 | 435.41   | 168.53  | 0.39 | 0.00 |
| small G protein signaling modulator 2                                           | Sgsm1     | 1290.88 | 891.83   | 0.69 | 0.19 | 1718.04  | 3003.06 | 1.75 | 0.00 |
| SLIT-ROBO Rho GTPase activating protein 1                                       | Sgsm2     | 474.65  | 464.71   | 0.98 | 0.99 | 540.38   | 915.09  | 1.69 | 0.00 |
|                                                                                 | Srgap1    | 470.46  | 636.13   | 1.35 | 0.50 | 147.24   | 307.29  | 2.09 | 0.00 |

|                                            |         |         |         |      |      |         |         |      |      |
|--------------------------------------------|---------|---------|---------|------|------|---------|---------|------|------|
| SLIT-ROBO Rho GTPase activating protein 2  | Srgap2  | 584.04  | 760.82  | 1.30 | 0.55 | 509.73  | 275.49  | 0.54 | 0.00 |
| synapse defective 1, Rho GTPase, homolog 1 | Syde1   | 305.16  | 352.97  | 1.16 | 0.82 | 226.46  | 46.96   | 0.21 | 0.00 |
| synaptotagmin-like 4                       | Syt4    | 3331.31 | 1451.69 | 0.44 | 0.18 | 2702.49 | 5901.24 | 2.18 | 0.00 |
| TBC1 domain family, member 24              | Tbc1d24 | 213.46  | 263.32  | 1.23 | 0.66 | 394.29  | 655.78  | 1.66 | 0.00 |
| TBC1 domain family, member 2B              | Tbc1d2b | 643.64  | 847.21  | 1.32 | 0.51 | 385.92  | 223.72  | 0.58 | 0.04 |
| thymus cell antigen 1, theta               | Thy1    | 616.06  | 645.00  | 1.05 | 0.98 | 316.84  | 101.17  | 0.32 | 0.00 |
| WD repeat domain 67                        | Wdr67   | 169.69  | 236.15  | 1.39 | 0.47 | 146.37  | 306.12  | 2.09 | 0.00 |

#### RYBOSOMAL GENES

|                                     |         |          |          |      |      |          |          |      |      |
|-------------------------------------|---------|----------|----------|------|------|----------|----------|------|------|
| mitochondrial ribosomal protein L1  | Mrpl1   | 606.88   | 388.99   | 0.64 | 0.08 | 429.07   | 667.38   | 1.56 | 0.03 |
| mitochondrial ribosomal protein L15 | Mrpl15  | 323.29   | 326.55   | 1.01 | 1.00 | 605.07   | 351.72   | 0.58 | 0.00 |
| mitochondrial ribosomal protein L52 | Mrpl52  | 494.32   | 501.99   | 1.02 | 1.00 | 576.15   | 333.84   | 0.58 | 0.00 |
| mitochondrial ribosomal protein S24 | Mrps24  | 393.62   | 380.44   | 0.97 | 0.99 | 617.43   | 364.42   | 0.59 | 0.00 |
| MRT4, mRNA turnover 4               | Mrto4   | 337.13   | 405.48   | 1.20 | 0.83 | 298.20   | 155.48   | 0.52 | 0.00 |
| ribosomal protein L10-like          | Rpl10   | 291.49   | 402.18   | 1.38 | 0.42 | 398.03   | 164.36   | 0.41 | 0.00 |
| ribosomal protein L10A              | Rpl10a  | 508.83   | 636.62   | 1.25 | 0.66 | 538.47   | 215.14   | 0.40 | 0.00 |
| ribosomal protein L12               | Rpl12   | 314.67   | 369.13   | 1.17 | 0.80 | 382.98   | 176.02   | 0.46 | 0.00 |
| ribosomal protein L13               | Rpl13   | 662.76   | 607.34   | 0.92 | 0.92 | 580.32   | 282.31   | 0.49 | 0.00 |
| ribosomal protein L13A              | Rpl13a  | 11141.84 | 10667.76 | 0.96 | 0.96 | 14259.01 | 7667.80  | 0.54 | 0.00 |
| ribosomal protein L14               | Rpl14   | 2201.90  | 2061.88  | 0.94 | 0.92 | 1922.06  | 1023.79  | 0.53 | 0.00 |
| ribosomal protein L18               | Rpl18   | 1931.79  | 1734.08  | 0.90 | 0.87 | 1816.39  | 1013.95  | 0.56 | 0.00 |
| ribosomal protein L18A              | Rpl18a  | 3232.03  | 3257.35  | 1.01 | 1.00 | 3662.93  | 1464.15  | 0.40 | 0.00 |
| ribosomal protein L19               | Rpl19   | 1170.33  | 1152.68  | 0.98 | 1.00 | 1209.70  | 763.76   | 0.63 | 0.00 |
| ribosomal protein L21               | Rpl21   | 463.68   | 452.21   | 0.98 | 1.00 | 512.63   | 265.29   | 0.52 | 0.00 |
| ribosomal protein L22               | Rpl22   | 3432.21  | 3189.51  | 0.93 | 0.91 | 3137.39  | 1798.21  | 0.57 | 0.00 |
| ribosomal protein L22 like 1        | Rpl22l1 | 1161.84  | 1070.97  | 0.92 | 0.91 | 1745.87  | 971.33   | 0.56 | 0.00 |
| ribosomal protein L23               | Rpl23   | 3369.63  | 3385.80  | 1.00 | 1.00 | 3625.60  | 1770.14  | 0.49 | 0.00 |
| ribosomal protein L26               | Rpl26   | 2452.09  | 2159.32  | 0.88 | 0.82 | 2774.77  | 1279.10  | 0.46 | 0.00 |
| ribosomal protein L27a              | Rpl27a  | 549.57   | 431.15   | 0.78 | 0.57 | 556.76   | 338.65   | 0.61 | 0.00 |
| ribosomal protein L29               | Rpl29   | 713.97   | 667.52   | 0.93 | 0.93 | 743.14   | 319.64   | 0.43 | 0.00 |
| ribosomal protein L3                | Rpl3    | 894.67   | 1040.88  | 1.16 | 0.75 | 1031.44  | 524.99   | 0.51 | 0.00 |
| ribosomal protein L30               | Rpl30   | 2261.42  | 2196.38  | 0.97 | 0.99 | 2341.70  | 966.37   | 0.41 | 0.00 |
| ribosomal protein L32               | Rpl32   | 6233.83  | 6409.49  | 1.03 | 1.00 | 9726.23  | 3709.31  | 0.38 | 0.00 |
| ribosomal protein L34               | Rpl34   | 2751.45  | 2653.63  | 0.96 | 0.98 | 2741.64  | 1458.22  | 0.53 | 0.00 |
| ribosomal protein L35               | Rpl35   | 1971.58  | 2423.14  | 1.23 | 0.76 | 3137.64  | 1201.86  | 0.38 | 0.00 |
| ribosomal protein L35A              | Rpl35a  | 1929.90  | 1806.56  | 0.94 | 0.93 | 2006.31  | 1133.85  | 0.57 | 0.00 |
| ribosomal protein L36               | Rpl36   | 197.09   | 193.76   | 0.98 | 1.00 | 173.20   | 101.85   | 0.59 | 0.03 |
| ribosomal protein L37               | Rpl37   | 2125.75  | 1989.81  | 0.94 | 0.93 | 2640.34  | 1293.09  | 0.49 | 0.00 |
| ribosomal protein L37A              | Rpl37a  | 3418.91  | 3076.11  | 0.90 | 0.86 | 2474.56  | 1467.59  | 0.59 | 0.00 |
| ribosomal protein L39               | Rpl39   | 2097.85  | 1931.09  | 0.92 | 0.90 | 1855.05  | 978.83   | 0.53 | 0.00 |
| ribosomal protein L4                | Rpl4    | 17472.20 | 19298.47 | 1.10 | 0.86 | 23147.65 | 13020.52 | 0.56 | 0.00 |
| ribosomal protein L41               | Rpl41   | 4216.35  | 4287.39  | 1.02 | 1.00 | 6779.11  | 3225.47  | 0.48 | 0.00 |
| ribosomal protein L5                | Rpl5    | 429.56   | 357.68   | 0.83 | 0.74 | 297.84   | 98.68    | 0.33 | 0.00 |
| ribosomal protein L6                | Rpl6    | 2295.32  | 2371.99  | 1.03 | 0.99 | 2348.82  | 1291.28  | 0.55 | 0.00 |
| ribosomal protein L7                | Rpl7    | 4833.03  | 5009.74  | 1.04 | 0.98 | 5176.66  | 2872.62  | 0.55 | 0.00 |
| ribosomal protein L7A               | Rpl7a   | 1298.43  | 1344.30  | 1.04 | 0.99 | 1398.41  | 804.45   | 0.58 | 0.00 |
| ribosomal protein L8                | Rpl8    | 10640.22 | 10545.54 | 0.99 | 1.00 | 11489.13 | 6336.69  | 0.55 | 0.00 |
| ribosomal protein L9                | Rpl9    | 367.59   | 339.69   | 0.92 | 0.92 | 303.69   | 181.01   | 0.60 | 0.03 |
| ribosomal protein, large, P0        | Rplp0   | 11662.31 | 13522.83 | 1.16 | 0.75 | 13020.78 | 6320.93  | 0.49 | 0.00 |

|                                                           |         |          |          |      |      |          |         |      |      |
|-----------------------------------------------------------|---------|----------|----------|------|------|----------|---------|------|------|
| ribosomal protein, large, P1                              | Rplp1   | 8667.85  | 9583.47  | 1.11 | 0.94 | 15058.10 | 6275.36 | 0.42 | 0.00 |
| ribosomal protein, large P2                               | Rplp2   | 5269.12  | 4829.73  | 0.92 | 0.89 | 4399.49  | 2107.73 | 0.48 | 0.00 |
| ribosomal protein S10                                     | Rps10   | 2610.10  | 2212.11  | 0.85 | 0.76 | 2680.52  | 1181.35 | 0.44 | 0.00 |
| ribosomal protein S11                                     | Rps11   | 5864.45  | 6403.99  | 1.09 | 0.89 | 5170.77  | 2462.41 | 0.48 | 0.00 |
| ribosomal protein S14                                     | Rps14   | 8065.63  | 6880.31  | 0.85 | 0.71 | 8084.34  | 4478.27 | 0.55 | 0.00 |
| ribosomal protein S15                                     | Rps15   | 5664.41  | 5350.17  | 0.94 | 0.95 | 6507.83  | 3296.77 | 0.51 | 0.00 |
| ribosomal protein S15A                                    | Rps15a  | 3141.35  | 3013.46  | 0.96 | 0.98 | 2402.73  | 1187.09 | 0.49 | 0.00 |
| ribosomal protein S17                                     | Rps17   | 434.19   | 475.52   | 1.10 | 0.92 | 572.49   | 344.45  | 0.60 | 0.00 |
| ribosomal protein S18                                     | Rps18   | 2148.72  | 2150.28  | 1.00 | 1.00 | 2309.38  | 970.01  | 0.42 | 0.00 |
| ribosomal protein S19                                     | Rps19   | 2916.79  | 2626.21  | 0.90 | 0.91 | 2931.82  | 1282.34 | 0.44 | 0.00 |
| ribosomal protein S2                                      | Rps2    | 3960.29  | 4235.87  | 1.07 | 0.96 | 4217.60  | 1870.75 | 0.44 | 0.00 |
| ribosomal protein S20                                     | Rps20   | 2389.22  | 2203.75  | 0.92 | 0.93 | 2291.33  | 1109.00 | 0.48 | 0.00 |
| ribosomal protein S21                                     | Rps21   | 4972.68  | 4527.40  | 0.91 | 0.86 | 5678.47  | 3300.68 | 0.58 | 0.00 |
| ribosomal protein S24                                     | Rps24   | 3759.04  | 3638.98  | 0.97 | 0.99 | 5248.55  | 2264.69 | 0.43 | 0.00 |
| ribosomal protein S25                                     | Rps25   | 1383.09  | 1430.84  | 1.03 | 0.99 | 1717.11  | 850.73  | 0.50 | 0.00 |
| ribosomal protein S26                                     | Rps26   | 2599.01  | 2535.88  | 0.98 | 0.99 | 2384.49  | 1084.20 | 0.45 | 0.00 |
| ribosomal protein S27-like                                | Rps27l  | 1113.69  | 1204.62  | 1.08 | 0.98 | 2490.27  | 1047.15 | 0.42 | 0.00 |
| ribosomal protein S28                                     | Rps28   | 2626.54  | 2390.64  | 0.91 | 0.88 | 2575.73  | 1113.75 | 0.43 | 0.00 |
| ribosomal protein S3                                      | Rps3    | 13759.43 | 13435.18 | 0.98 | 0.99 | 14484.81 | 7600.90 | 0.52 | 0.00 |
| ribosomal protein S3A                                     | Rps3a   | 2877.36  | 2835.04  | 0.99 | 1.00 | 2841.60  | 1684.39 | 0.59 | 0.00 |
| ribosomal protein S4, X-linked                            | Rps4x   | 5462.15  | 6117.85  | 1.12 | 0.84 | 4826.11  | 2325.52 | 0.48 | 0.00 |
| ribosomal protein S5                                      | Rps5    | 9344.63  | 9308.65  | 1.00 | 1.00 | 8855.53  | 4396.37 | 0.50 | 0.00 |
| ribosomal protein S6 kinase polypeptide 1                 | Rps6ka1 | 361.81   | 464.69   | 1.28 | 0.58 | 341.06   | 117.44  | 0.34 | 0.00 |
| ribosomal protein S6 kinase, polypeptide 2                | Rps6ka2 | 849.77   | 751.01   | 0.88 | 0.85 | 797.54   | 1589.04 | 1.99 | 0.00 |
| ribosomal protein S6 kinase-like 1                        | Rps6kl1 | 103.83   | 86.31    | 0.83 | 0.77 | 173.02   | 348.87  | 2.02 | 0.01 |
| ribosomal protein S7                                      | Rps7    | 190.72   | 171.43   | 0.90 | 0.89 | 245.40   | 116.07  | 0.47 | 0.00 |
| ribosomal protein S8                                      | Rps8    | 1280.97  | 1173.02  | 0.92 | 0.94 | 1619.71  | 692.49  | 0.43 | 0.00 |
| ribosomal protein S9                                      | Rps9    | 7114.12  | 7093.41  | 1.00 | 1.00 | 7644.02  | 3602.60 | 0.47 | 0.00 |
| ribosomal protein SA                                      | Rpsa    | 1442.89  | 1469.07  | 1.02 | 1.00 | 1675.70  | 807.49  | 0.48 | 0.00 |
| ubiquitin A-52 residue ribosomal protein fusion product 1 | Uba52   | 353.26   | 379.35   | 1.07 | 0.95 | 532.62   | 243.58  | 0.46 | 0.00 |
