# Supplementary material for: Aldehyde dehydrogenase activity is necessary for beta cell development and functionality in mice
Source: PubMed Central journal article supplement (PMC4670456; doi:10.1007/s00125-015-3784-4), 2015-10-31
Supplement: 125_2015_3784_MOESM10_ESM.pdf [file 125_2015_3784_MOESM10_ESM.pdf]

**ESM Table 3** Expression levels by RNA Seq of *Aldh* genes during pancreas development

| <b>GENE SYMBOL</b> | <b>13.5 dpc</b> | <b>14.5 dpc</b> | <b>15.5 dpc</b> |
|--------------------|-----------------|-----------------|-----------------|
| Aldh111            | 68              | 83              | 442             |
| Aldh1a1            | 128             | 157             | 810             |
| Aldh4a1            | 459             | 359             | 786             |
| Aldh6a1            | 562             | 478             | 844             |
| Aldh3a2            | 618             | 550             | 706             |
| Aldh1a2            | 767             | 733             | 724             |
| Aldh5a1            | 917             | 1025            | 1050            |
| Aldh16a1           | 955             | 768             | 1230            |
| Aldh9a1            | 1253            | 1257            | 2386            |
| Aldh18a1           | 2123            | 2189            | 2968            |
| Aldh2              | 2086            | 1911            | 2224            |
| Aldh7a1            | 2402            | 2345            | 4099            |
| Aldh1b1            | 5061            | 5153            | 8101            |
